# Supplementary material
Source: Research Square preprint supplement (doi:10.21203/rs.3.rs-9047309/v1)
Supplement: Supplementary file 1 [file 98e322d4a36423f265b7576f.doc]

**Edinburgh Postnatal Depression Scale (EPDS)**

Please choose the answer that comes closest to how you have felt in the past 7 days.

**1. I have been able to laugh and see the funny side of things**

0 As much as I always could

1 Not quite so much now

2 Definitely not so much now

3 Not at all

**2. I have looked forward with enjoyment to things**

0 As much as I ever did

1 Rather less than I used to

2 Definitely less than I used to

3 Hardly at all

**3. I have blamed myself unnecessarily when things went wrong**

0 Yes, most of the time

1 Yes, some of the time

2 Not very often

3 No, never

**4. I have been anxious or worried for no good reason**

0 No, not at all

1 Hardly ever

2 Yes, sometimes

3 Yes, very often

**5. I have felt scared or panicky for no very good reason**

0 Yes, quite a lot

1 Yes, sometimes

2 No, not much

3 No, not at all

**6. Things have been getting on top of me**

0 Yes, most of the time I haven’t been able to cope at all

1 Yes, sometimes I haven’t been coping as well as usual

2 No, most of the time I have coped quite well

3 No, I have been coping as well as ever

**7. I have been so unhappy that I have had difficulty sleeping**

0 Yes, most of the time

1 Yes, sometimes

2 Not very often

3 No, not at all

**8. I have felt sad or miserable**

0 Yes, most of the time

1 Yes, quite often

2 Only occasionally

3 No, never

**9. I have been so unhappy that I have been crying**

0 Yes, most of the time

1 Yes, quite often

2 Only occasionally

3 No, never

**10. The thought of harming myself has occurred to me**

0 Yes, quite often

1 Sometimes

2 Hardly ever

3 Never

**Scoring**

Questions 1, 2 and 4 are scored 0, 1, 2 or 3 with top number scored as 0 and the bottom number scored as 3. Questions 3 and 5­─10 are reverse scored, with the top number scored as a 3 and the bottom number scored as 0.

**The Basic Nordic Sleep Questionnaire (BNSQ)**

**1. Have you had difficulties to fall asleep during the past month?**

1 never or less than once per month

2 less than once per week

3 on 1–2 nights per week

4 on 3–5 nights per week

5 every night or almost every night

**2. How often have you woken up at night during the past month?**

1 never or less than once per month

2 less than once per week

3 on 1–2 nights per week

4 on 3–5 nights per week

5 every night or almost every night per week

**3. How many times do you usually wake up during a night (during the past month)?**

1 I do not wake up at night usually

2 once per night

3 twice per night

4 3–4 times per night

5 at least 5 times per night

**4. How often have you awakened too early in the morning without being able to fall asleep again during the past month?**

1 never or less than once per month

2 less than once per week

3 on 1–2 days per week

4 on 3–5 days per week

5 every night or almost every night

**5. How well have you been sleeping during the past month? (general sleep quality)**

1 well

2 quite well

3 neither well nor poorly

4 quite poor

5 poor

**6. Do you snore while sleeping?** (ask other people if you are not sure)

1 never or less than once per month

2 less than once per week

3 on 1–2 nights per week

4 on 3–5 nights per week

5 every night or almost every night

**7. Have you had breathing pauses (sleep apneas) while sleeping?** (ask other people if you are not sure)

1 never or less than once per month

2 less than once per week

3 on 1–2 nights per week

4 on 3–5 nights per week

5 every night or almost every night

**8. Do you feel excessively sleepy in the morning after awakening during?**

1 never or less than once per month

2 less than once per week

3 on 1–2 days per week

4 on 3–5 days per week

5 every day or almost every day

**9. Do you feel excessively sleepy during the daytime?**

1 never or less than once per month

2 less than once per week

3 on 1–2 days per week

4 on 3–5 days per week

5 every day or almost every day

**10. How often do you take naps during the day?**

1 never or less than once per month

2 less than once per week

3 on 1–2 days per week

4 on 3–5 days per week

5 every day or almost every day

**11. How long do you usually sleep per night? ___hours ___minutes**

**12. How many hours of sleep do you need per night (how many hours would you like to sleep if you had possibility to sleep as long as you need to)? ___hours ___minutes**

**The experience of labor (asked after labor)**

**How was your experience of labor?**

1 very positive

2 quite positive

3 quite negative, but I was able to cope soon

4 very negative

**Manuscript title:**

Experiences of labor in women undergoing induced and spontaneous onset of labor: Associations with depressive symptoms and sleep disturbances

**Journal:** Archives of women’s mental health
